# Supplementary material for: Progressing Ultragreen, Energy-Efficient Biobased Depolymerization of Poly(ethylene terephthalate) via Microwave-Assisted Green Deep Eutectic Solvent and Enzymatic Treatment
Source: MDPI journal article supplement (doi:10.3390/polym14010109), 2021-12-29
Supplement: s1 [file s1]

## Supporting Information

# Progressing Ultragreen, Energy-Efficient Biobased Depolymerization of Poly(Ethylene Terephthalate) via Microwave-Assisted Green Deep Eutectic Solvent and Enzymatic Treatment

Olivia A. Attallah <sup>1,2,†</sup>, Muhammad Azeem <sup>1,\*,†</sup>, Efstratios Nikolaivits <sup>3</sup>, Evangelos Topakas <sup>3</sup> and Margaret Brennan Fournet <sup>1</sup>

<sup>1</sup> Materials Research Institute, Technological University of the Shannon: Midlands Midwest, N37 HD68 Athlone, Ireland; oadly@ait.ie (O.A.A.); mfournet@ait.ie (M.B.F.)

<sup>2</sup> Pharmaceutical Chemistry Department, Faculty of Pharmacy, Heliopolis University, Cairo-Belbeis Desert Road, El Salam, Cairo 11777, Egypt

<sup>3</sup> Industrial Biotechnology & Biocatalysis Group, Biotechnology Laboratory, School of Chemical Engineering, National Technical University of Athens, Athens 15780, Greece; stratosnikolai@gmail.com (E.N.); vtopakas@chemeng.ntua.gr (E.T.)

\* Correspondence: m.azeem@research.ait.ie

† These authors contributed equally to this work.

### Note:

Number of Pages 5

Number of Figures S1

Number of Tables S1

## Table of Content

|                                                                             |   |
|-----------------------------------------------------------------------------|---|
| <b>Table S1:</b> Different compositions of DESs used in PET recycling ..... | 3 |
| <b>Figure S1:</b> Post-enzymatic hydrolysis products .....                  | 4 |

**TableS1.** Different compositions of DESs used in PET recycling

| DES composition                                                                                                                                                                                                                                 |                                                |                 | Reaction conditions |                              |             | Results                                     | Reference |
|-------------------------------------------------------------------------------------------------------------------------------------------------------------------------------------------------------------------------------------------------|------------------------------------------------|-----------------|---------------------|------------------------------|-------------|---------------------------------------------|-----------|
| HBA                                                                                                                                                                                                                                             | HBD                                            | Ratio (HBA:HBD) | Reaction time       | Depolymerizing agent         | Temperature |                                             |           |
| Choline chloride                                                                                                                                                                                                                                | Glycerol                                       | 1:2             | 80-100 s            | Glycerol, NaOH               | -           | 38-61% weight loss of PET                   | [1]       |
| Choline chloride                                                                                                                                                                                                                                | Zinc chloride                                  | 1:1–1:3         | 30 min              | Diethanolamine, ethanolamine | -           | THETA, TPA, BHETA (82, 83 and 95 yield%)    | [2]       |
|                                                                                                                                                                                                                                                 | Urea                                           | 1:2             |                     |                              |             |                                             |           |
| Potassium carbonate                                                                                                                                                                                                                             | Ethylene glycol,                               | 1:6             | 2 h                 | ethylene glycol              | 180 °C      | BHET (88 yield%)                            | [3]       |
| Choline chloride                                                                                                                                                                                                                                | Urea, Dimethyl urea, Ethylene glycol, Glycerol | 1:2             |                     |                              |             |                                             |           |
| Zinc chloride, zinc acetate, manganese acetate                                                                                                                                                                                                  | Urea                                           | 1:12 to 1:6     | 30 min              | ethylene glycol              | 170 °C      | bis(hydroxyalkyl) terephthalate (83 yield%) | [4]       |
| 1-methyl-3-butylimidazolium chloride                                                                                                                                                                                                            | Zinc chloride, Manganese chloride              | 1:1             | 5.0 h               | ethylene glycol              | 190 °C      | BHET (83.8 yield%)                          | [5]       |
| Choline chloride                                                                                                                                                                                                                                | Ethylene glycol                                | 1:2             | 120 s               | ethylene glycol, NaOH        | 144 °C      | 45.8% weight loss of PET                    | [6]       |
| Hydrogen bond donor (HBD); hydrogen bond acceptor (HBA); (2-hydroxyethyl)-terephthalamide (THETA); Terephthalic acid: (TPA); bis (2-hydroxy ethylene) terephthalamide: (BHETA); bis(hydroxyethyl) terephthalate (BHET); sodium hydroxide (NaOH) |                                                |                 |                     |                              |             |                                             |           |

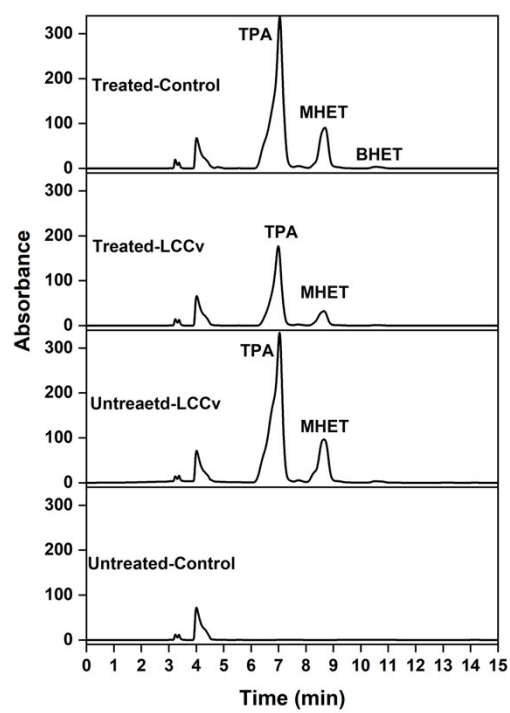

Figure S1. HPLC chromatograms of post-enzymatic hydrolysis products

- [1] S. Choi and H. M. Choi, "Eco-friendly, Expeditious Depolymerization of PET in the Blend Fabrics by Using a Bio-based Deep Eutectic Solvent under Microwave Irradiation for Composition Identification," *Fibers Polym.*, vol. 20, no. 4, pp. 752–759, 2019.
- [2] R. M. Musale and S. R. Shukla, "Deep eutectic solvent as effective catalyst for aminolysis of polyethylene terephthalate (PET) waste," *Int. J. Plast. Technol.*, vol. 20, no. 1, pp. 106–120, 2016.
- [3] E. Sert, E. Yilmaz, and F. S. Atalay, "Chemical Recycling of Polyethylene Terephthalate by Glycolysis Using Deep Eutectic Solvents," *J. Polym. Environ.*, vol. 27, no. 12, pp. 2956–2962, 2019.
- [4] Q. Wang, X. Yao, Y. Geng, Q. Zhou, X. Lu, and S. Zhang, "Deep eutectic solvents as highly active catalysts for the fast and mild glycolysis of poly(ethylene terephthalate)(PET)," *Green Chem.*, vol. 17, no. 4, pp. 2473–2479, 2015.
- [5] Q. F. Yue, L. F. Xiao, M. L. Zhang, and X. F. Bai, "The glycolysis of poly(ethylene terephthalate) waste: Lewis acidic ionic liquids as high efficient catalysts," *Polymers (Basel)*, vol. 5, no. 4, pp. 1258–1271, 2013.
- [6] J. Y. Cho, H. M. Choi, and K. W. Oh, "Rapid hydrophilic modification of poly(ethylene terephthalate) surface by using deep eutectic solvent and microwave irradiation," *Text. Res. J.*, vol. 86, no. 12, pp. 1318–1327, 2016.
